# Supplementary material for: Implementation of Biotechnology Applied to Medicine Course Using Virtual Laboratories: Perceptions and Attitudes of Students
Source: MDPI journal article supplement (doi:10.3390/educsci14020157), 2024-02-02
Supplement: s1 [file s1]

## Appendix B. Answers with no changes after the course

| 1. Recombinant DNA statements. It is acceptable to combine genes:                                      |        |       |                                         |                                            | 2. Cloning statements. Cloning plants is acceptable for:                             |                                                       |                         |       |
|--------------------------------------------------------------------------------------------------------|--------|-------|-----------------------------------------|--------------------------------------------|--------------------------------------------------------------------------------------|-------------------------------------------------------|-------------------------|-------|
| The same plant species                                                                                 |        |       | The same animal species                 |                                            | Food for human consumption                                                           |                                                       | Medical purposes        |       |
| Answer                                                                                                 | Before | After | Before                                  | After                                      | Before                                                                               | After                                                 | Before                  | After |
| Totally Disagree                                                                                       | 0.9    | 1.4   | 3.3                                     | 3.3                                        | 2.8                                                                                  | 2.4                                                   | 0.9                     | 0.9   |
| Disagree                                                                                               | 1.4    | .5    | 6.2                                     | 7.7                                        | 14.7                                                                                 | 10.9                                                  | 2.4                     | 1.4   |
| Neutral                                                                                                | 13.7   | 11.4  | 17.1                                    | 25.4                                       | 20.9                                                                                 | 18.0                                                  | 7.6                     | 7.6   |
| Agree                                                                                                  | 32.7   | 35.5  | 38.6                                    | 30.1                                       | 24.2                                                                                 | 30.8                                                  | 35.5                    | 28.4  |
| Totally Agree                                                                                          | 51.2   | 51.2  | 34.8                                    | 33.5                                       | 37.4                                                                                 | 37.9                                                  | 53.6                    | 61.6  |
| 3. Genetic manipulation statements. It is acceptable to direct the genetic material of an organism by: |        |       |                                         |                                            |                                                                                      |                                                       |                         |       |
| Inserting a foreign gene                                                                               |        |       | Blocking expression of an existing gene |                                            | Using selective breeding programs                                                    |                                                       | Artificial insemination |       |
| Answer                                                                                                 | Before | After | Before                                  | After                                      | Before                                                                               | After                                                 | Before                  | After |
| Totally Disagree                                                                                       | 14.2   | 9.5   | 2.4                                     | 1.4                                        | 10.4                                                                                 | 5.7                                                   | 2.4                     | 2.9   |
| Disagree                                                                                               | 27.5   | 24.8  | 9.0                                     | 10.0                                       | 15.2                                                                                 | 18.5                                                  | 4.3                     | 8.6   |
| Neutral                                                                                                | 29.4   | 31.0  | 31.3                                    | 25.1                                       | 29.9                                                                                 | 38.9                                                  | 23.2                    | 17.1  |
| Agree                                                                                                  | 17.1   | 21.4  | 38.9                                    | 37.4                                       | 28.0                                                                                 | 21.3                                                  | 40.8                    | 41.9  |
| Totally Agree                                                                                          | 11.8   | 13.3  | 18.5                                    | 26.1                                       | 16.6                                                                                 | 15.6                                                  | 29.4                    | 29.5  |
| 4. Cloning animals is an acceptable form of reproduction for:                                          |        |       |                                         |                                            |                                                                                      |                                                       |                         |       |
| Food for human consumption                                                                             |        |       | Food for animal feed                    |                                            | Maintaining purity in show breeds                                                    |                                                       | Medical research uses   |       |
| Answer                                                                                                 | Before | After | Before                                  | After                                      | Before                                                                               | After                                                 | Before                  | After |
| Totally Disagree                                                                                       | 12.3   | 5.2   | 9.0                                     | 3.3                                        | 10.0                                                                                 | 5.2                                                   | 25.6                    | 1.4   |
| Disagree                                                                                               | 28.0   | 25.6  | 24.6                                    | 20.9                                       | 17.5                                                                                 | 16.1                                                  | 36.5                    | 5.7   |
| Neutral                                                                                                | 22.3   | 30.8  | 25.6                                    | 35.5                                       | 19.0                                                                                 | 25.6                                                  | 24.2                    | 21.3  |
| Agree                                                                                                  | 20.4   | 20.9  | 25.1                                    | 23.7                                       | 25.6                                                                                 | 28.0                                                  | 7.1                     | 31.3  |
| Totally Agree                                                                                          | 17.1   | 17.5  | 15.6                                    | 16.6                                       | 28.0                                                                                 | 25.1                                                  | 6.6                     | 40.3  |
| 5. Genetically altered food statements                                                                 |        |       |                                         |                                            |                                                                                      |                                                       |                         |       |
| It is acceptable to genetically engineer plants for food                                               |        |       |                                         | Genetically altered food should be labeled |                                                                                      | Genetically altered food is superior to traditionally |                         |       |
| Answer                                                                                                 | Before |       | After                                   | Before                                     | After                                                                                | Before                                                |                         | After |
| Totally Disagree                                                                                       | 2.4    |       | 1.9                                     | 0.5                                        | 0.9                                                                                  | 25.6                                                  |                         | 14.2  |
| Disagree                                                                                               | 10.4   |       | 9.0                                     | 2.4                                        | 1.9                                                                                  | 36.5                                                  |                         | 28.4  |
| Neutral                                                                                                | 37.0   |       | 32.7                                    | 3.8                                        | 3.3                                                                                  | 24.2                                                  |                         | 35.5  |
| Agree                                                                                                  | 30.8   |       | 37.4                                    | 19.4                                       | 17.5                                                                                 | 7.1                                                   |                         | 13.3  |
| Totally Agree                                                                                          | 19.4   |       | 19.0                                    | 73.9                                       | 76.3                                                                                 | 6.6                                                   |                         | 8.5   |
| 6. Altered food statements                                                                             |        |       |                                         |                                            |                                                                                      |                                                       |                         |       |
| Cloning plants is acceptable for food for human consumption                                            |        |       |                                         |                                            | Cloning animals is an acceptable form of reproduction for food for human consumption |                                                       |                         |       |
| Answer                                                                                                 | Before |       | After                                   |                                            | Before                                                                               |                                                       | After                   |       |
| Totally Disagree                                                                                       | 3.8    |       | 0.9                                     |                                            | 16.1                                                                                 |                                                       | 7.1                     |       |
| Disagree                                                                                               | 14.2   |       | 11.4                                    |                                            | 31.8                                                                                 |                                                       | 33.2                    |       |
| Neutral                                                                                                | 32.2   |       | 35.5                                    |                                            | 27.5                                                                                 |                                                       | 33.2                    |       |
| Agree                                                                                                  | 31.3   |       | 29.9                                    |                                            | 16.1                                                                                 |                                                       | 16.6                    |       |
| Totally Agree                                                                                          | 18.5   |       | 22.3                                    |                                            | 8.5                                                                                  |                                                       | 10.0                    |       |
| 7. Legal Issues of Biotechnology statements. An individual's genetic profile should be available to:   |        |       |                                         |                                            | 8. It is acceptable to patent a genetically altered:                                 |                                                       |                         |       |

|                                                              | The individual |       | Insurance companies |                            | Bacteria |                                          | Plant  |                                                                       | Animal such as a mouse |                                                                    | Animal such as a monkey |       |       |
|--------------------------------------------------------------|----------------|-------|---------------------|----------------------------|----------|------------------------------------------|--------|-----------------------------------------------------------------------|------------------------|--------------------------------------------------------------------|-------------------------|-------|-------|
| Answer                                                       | Before         | After | Before              | After                      | Before   | After                                    | Before | After                                                                 | Before                 | After                                                              | Before                  | After |       |
| Totally Disagree                                             | 0              | 1.4   | 18.0                | 14.2                       | 5.7      | 6.6                                      | 3.8    | 5.2                                                                   | 9.0                    | 8.1                                                                | 10.9                    | 9.5   |       |
| Disagree                                                     | 0.5            | 0.9   | 24.6                | 29.4                       | 15.6     | 14.7                                     | 10.9   | 8.5                                                                   | 20.9                   | 26.5                                                               | 20.9                    | 28.4  |       |
| Neutral                                                      | 8.1            | 6.6   | 30.3                | 28.9                       | 22.3     | 20.9                                     | 25.6   | 21.3                                                                  | 30.3                   | 23.2                                                               | 29.4                    | 23.7  |       |
| Agree                                                        | 28.0           | 28.4  | 17.5                | 13.7                       | 32.2     | 32.7                                     | 36.0   | 38.9                                                                  | 24.6                   | 24.6                                                               | 24.2                    | 21.3  |       |
| Totally Agree                                                | 63.5           | 62.6  | 9.5                 | 13.7                       | 24.2     | 25.1                                     | 23.7   | 26.1                                                                  | 15.2                   | 17.5                                                               | 14.7                    | 17.1  |       |
| 9. Risks of Biotechnology statements.                        |                |       |                     |                            |          |                                          |        |                                                                       |                        |                                                                    |                         |       |       |
| 10. The risk of genetic engineering is:                      |                |       |                     |                            |          |                                          |        |                                                                       |                        |                                                                    |                         |       |       |
| Genetically altered organisms                                |                |       |                     |                            |          |                                          |        |                                                                       |                        |                                                                    |                         |       |       |
| Present a health hazard                                      |                |       |                     | Outweighed by the benefits |          | Minimal due to strict safety regulations |        | That Biotechnology may contribute to the disappearance of small farms |                        | That society's tolerance of people with disabilities will decrease |                         |       |       |
| Answer                                                       | Before         | After | Before              | After                      | Before   | After                                    | Before | After                                                                 | Before                 | After                                                              | Before                  | After |       |
| Totally Disagree                                             | 6.6            | 3.3   | 1.9                 | 1.9                        | 3.3      | 0.9                                      | 2.8    | 3.8                                                                   | 4.7                    | 5.7                                                                |                         |       |       |
| Disagree                                                     | 10.0           | 11.8  | 12.8                | 8.5                        | 9.0      | 10.9                                     | 17.1   | 18.5                                                                  | 20.4                   | 17.1                                                               |                         |       |       |
| Neutral                                                      | 31.8           | 35.5  | 42.2                | 40.3                       | 34.1     | 27.0                                     | 26.5   | 25.6                                                                  | 46.9                   | 37.4                                                               |                         |       |       |
| Agree                                                        | 23.2           | 34.1  | 32.2                | 29.9                       | 43.1     | 46.0                                     | 39.8   | 34.1                                                                  | 20.9                   | 28.4                                                               |                         |       |       |
| Totally Agree                                                | 28.4           | 15.2  | 10.9                | 19.4                       | 10.4     | 15.2                                     | 13.7   | 18.0                                                                  | 7.1                    | 11.4                                                               |                         |       |       |
| 11. Benefits of Biotechnology statements. Biotechnology may: |                |       |                     |                            |          |                                          |        |                                                                       |                        |                                                                    |                         |       |       |
| Alleviate world food shortages                               |                |       |                     |                            |          |                                          |        |                                                                       |                        |                                                                    |                         |       |       |
| Create new job opportunities                                 |                |       |                     |                            |          |                                          |        |                                                                       |                        |                                                                    |                         |       |       |
| Answer                                                       | Before         |       |                     |                            | After    |                                          |        |                                                                       | Before                 |                                                                    |                         |       | After |
| Totally Disagree                                             | 0.5            |       |                     |                            | 0        |                                          |        |                                                                       | 1.4                    |                                                                    |                         |       | .5    |
| Disagree                                                     | 1.9            |       |                     |                            | 3.3      |                                          |        |                                                                       | 2.8                    |                                                                    |                         |       | 1.4   |
| Neutral                                                      | 17.5           |       |                     |                            | 13.3     |                                          |        |                                                                       | 12.3                   |                                                                    |                         |       | 8.5   |
| Agree                                                        | 37.4           |       |                     |                            | 39.3     |                                          |        |                                                                       | 37.4                   |                                                                    |                         |       | 38.9  |
| Totally Agree                                                | 42.7           |       |                     |                            | 44.1     |                                          |        |                                                                       | 46.0                   |                                                                    |                         |       | 50.7  |

| Perceptions and attitudes |                                           | Item                                                                                                     |
|---------------------------|-------------------------------------------|----------------------------------------------------------------------------------------------------------|
| 1                         | Genetic manipulation statements           | <i>It is acceptable to direct the genetic material of an organism by:</i>                                |
|                           |                                           | a) Inserting a foreign gene                                                                              |
|                           |                                           | b) Blocking expression of an existing gene                                                               |
|                           |                                           | c) Using selective breeding programs                                                                     |
|                           |                                           | d) Artificial insemination                                                                               |
| 2                         | It is acceptable to combine genes between | <i>It is acceptable to combine genes between:</i>                                                        |
|                           |                                           | a) The same plant species                                                                                |
|                           |                                           | b) Different plant species                                                                               |
|                           |                                           | c) The same animal species                                                                               |
|                           |                                           | d) Different animal species                                                                              |
| 3                         | Cloning statements                        | <i>Cloning plants is acceptable for:</i>                                                                 |
|                           |                                           | a) Food for human consumption.                                                                           |
|                           |                                           | b) Non-food products                                                                                     |
|                           |                                           | c) Medical purposes                                                                                      |
|                           |                                           | <i>Cloning animals is an acceptable form of reproduction for:</i>                                        |
|                           |                                           | a) Food for human consumption                                                                            |
|                           |                                           | b) Food for animal feed                                                                                  |
|                           |                                           | c) Maintaining purity in show breeds                                                                     |
| 4                         | Genetically altered food statements       | d) Medical research uses                                                                                 |
|                           |                                           | <i>Genetically altered food should be labeled</i>                                                        |
|                           |                                           | a) Genetically altered food is superior to traditionally                                                 |
|                           |                                           | b) Biotechnology may alleviate world food shortages.                                                     |
|                           |                                           | c) It is acceptable to genetically engineer plants for food                                              |
|                           |                                           | d) Cloning plants is acceptable for food for human consumption                                           |
|                           |                                           | e) Genetically altered organisms such as animals are safe to eat                                         |
| 5                         | Legal Issues of Biotechnology statements  | f) Cloning animals is an acceptable form of reproduction for food for human consumption                  |
|                           |                                           | <i>An individual's genetic profile should be available to:</i>                                           |
|                           |                                           | a) The individual                                                                                        |
|                           |                                           | b) Potential carriers                                                                                    |
|                           |                                           | c) Insurance companies                                                                                   |
|                           |                                           | <i>It is acceptable to patent a genetically altered:</i>                                                 |
|                           |                                           | a) Bacteria                                                                                              |
|                           |                                           | b) Plant                                                                                                 |
|                           |                                           | c) Animal such as a mouse                                                                                |
| 6                         | Risks of Biotechnology statements         | d) Animal such as a monkey                                                                               |
|                           |                                           | <i>Genetically altered organisms:</i>                                                                    |
|                           |                                           | a) Disrupt the balance of nature                                                                         |
|                           |                                           | b) Present a health hazard                                                                               |
|                           |                                           | <i>The risk of genetic engineering is:</i>                                                               |
|                           |                                           | Outweighed by the benefits                                                                               |
|                           |                                           | b) Minimal due to strict safety regulations                                                              |
|                           |                                           | c) Biotechnology may contribute to the disappearance of small farms                                      |
| 7                         | Benefits of Biotechnology statements      | d) The risk of genetic engineering is that society's tolerance of people with disabilities will decrease |
|                           |                                           | <i>Biotechnology may:</i>                                                                                |
|                           |                                           | Enhance the quality of life                                                                              |
|                           |                                           | b) Alleviate world food shortages                                                                        |
|                           |                                           | Create new job opportunities                                                                             |

| Percepciones y actitudes |                                                       | Item                                                                                                 |
|--------------------------|-------------------------------------------------------|------------------------------------------------------------------------------------------------------|
| 1                        | Enunciados sobre manipulación genética                | Es aceptable dirigir el material genético de un organismo mediante:                                  |
|                          |                                                       | a) Insertar un gen extraño                                                                           |
|                          |                                                       | b) Bloquear la expresión de un gen existente                                                         |
|                          |                                                       | c) Utilizar programas de crianza selectiva                                                           |
|                          |                                                       | d) Inseminación artificial                                                                           |
| 2                        | Es aceptable combinar genes                           | Es aceptable combinar genes entre:                                                                   |
|                          |                                                       | a) La misma especie de planta                                                                        |
|                          |                                                       | b) Diferentes especies de plantas                                                                    |
|                          |                                                       | c) La misma especie de animal                                                                        |
|                          |                                                       | d) Diferentes especies de animales                                                                   |
| 3                        | Enunciados sobre clonación                            | Clonar plantas es aceptable para:                                                                    |
|                          |                                                       | a) Alimento para consumo humano                                                                      |
|                          |                                                       | b) Productos no alimentarios                                                                         |
|                          |                                                       | c) Fines médicos                                                                                     |
|                          |                                                       | La clonación de animales es una forma aceptable de reproducción para:                                |
|                          |                                                       | a) Alimento para consumo humano                                                                      |
|                          |                                                       | b) Alimento para animales                                                                            |
|                          |                                                       | c) Mantener la pureza en razas de exhibición                                                         |
|                          |                                                       | d) Investigación médica                                                                              |
| 4                        | Enunciados sobre organismos genéticamente modificados | Los alimentos modificados genéticamente deben estar etiquetados:                                     |
|                          |                                                       | a) Los alimentos modificados genéticamente son superiores a los tradicionales                        |
|                          |                                                       | b) La biotecnología puede ayudar a aliviar la escasez mundial de alimentos                           |
|                          |                                                       | c) Es aceptable manipular genéticamente plantas para obtener alimentos                               |
|                          |                                                       | d) La clonación de plantas es aceptable para el consumo humano                                       |
|                          |                                                       | e) Los organismos modificados genéticamente, como los animales, son seguros para comer               |
|                          |                                                       | f) La clonación de animales es una forma aceptable de reproducción para alimento para consumo humano |
| 5                        | Enunciados sobre aspectos legales de la biotecnología | El perfil genético de un individuo debe estar disponible para:                                       |
|                          |                                                       | a) El individuo                                                                                      |
|                          |                                                       | b) Posibles portadores                                                                               |
|                          |                                                       | c) Compañías de seguros                                                                              |
|                          |                                                       | Es aceptable patentar un organismo modificado genéticamente si es:                                   |
|                          |                                                       | a) Bacteria                                                                                          |
|                          |                                                       | b) Planta                                                                                            |
|                          |                                                       | c) Animal como un ratón                                                                              |
|                          |                                                       | d) Animal como un mono                                                                               |
| 6                        | Enunciados sobre los riesgos de la biotecnología      | Los organismos modificados genéticamente:                                                            |
|                          |                                                       | a) Alteran el equilibrio de la naturaleza                                                            |
|                          |                                                       | b) Presentan un riesgo para la salud                                                                 |
|                          |                                                       | The risk of genetic engineering is:                                                                  |
|                          |                                                       | a) Alteran el equilibrio de la naturaleza                                                            |
|                          |                                                       | b) Presentan un riesgo para la salud                                                                 |
|                          |                                                       | a) Alteran el equilibrio de la naturaleza                                                            |
|                          |                                                       | b) Presentan un riesgo para la salud                                                                 |
| 7                        | Enunciados sobre los beneficios de la biotecnología.  | La biotecnología puede:                                                                              |
|                          |                                                       | a) Mejorar la calidad de vida                                                                        |
|                          |                                                       | b) Aliviar la escasez mundial de alimentos                                                           |
|                          |                                                       | c) Crear nuevas oportunidades de empleo                                                              |
